# Supplementary material for: Mapping Hidden Potential Identity Elements by Computing the Average Discriminating Power of Individual tRNA Positions
Source: PubMed Central journal article supplement — DNA Res. 2012 Feb 28;19(3):245–58. doi: 10.1093/dnares/dss008 (PMC3372374; doi:10.1093/dnares/dss008), 2012-02-28
Supplement: supp_dss008_dss008supp_table1.pdf [file supp_dss008_dss008supp_table1.pdf]

**Table S1****Major determinants in *E. coli* and yeast used as criteria for generating filtered datasets**

|            | Class I                                                             |                           | Class II       |                                                                                                             |
|------------|---------------------------------------------------------------------|---------------------------|----------------|-------------------------------------------------------------------------------------------------------------|
|            | <i>E. coli</i>                                                      | <i>S. cerevisiae</i>      | <i>E. coli</i> | <i>S. cerevisiae</i>                                                                                        |
| <b>Val</b> | A73<br>G3:C70, T4:A69<br>A35, C36                                   | A73<br>A35                | <b>Ser</b>     | G73<br>C72, G2:C71,<br>A3:T70, C11:G24,<br>R4:Y69<br>C11:G24                                                |
| <b>Ile</b> | A73<br>C4:G69<br>G34, A35, T36<br>A37, A38<br>T12:A23, C29:G41      | G34, A35, T36             | <b>Thr</b>     | G1:C72, C2:G71<br>G34, G35, T36<br>G1:C72<br>G35:T36                                                        |
| <b>Leu</b> | A73<br>T8•A14                                                       | A73<br>A35<br>G37         | <b>Pro</b>     | A73<br>G72<br>G35, G36<br>G15C48                                                                            |
| <b>Met</b> | A73<br>T4:A69, A5:T68<br>C34, A35, T36                              | A73<br>C34, A35, T36      | <b>Gly</b>     | T73<br>G1:C72, C2:G71,<br>G3:C70<br>C35, C36<br>A73<br>C2:G71, G3:C70<br>C35, C36                           |
| <b>Cys</b> | T73<br>G2:C71, C3:G70<br>G34, C35, A36                              | T73                       | <b>His</b>     | C73<br>G0<br>A73<br>G0<br>G34, T35                                                                          |
| <b>Tyr</b> | A73<br>T35                                                          | A73<br>C1:G72<br>G34, T35 | <b>Asp</b>     | G73<br>G2:C71<br>G34, T35, C36<br>C38<br>C38<br>G10<br>G73<br>G34, T35, C36<br>C38<br>G10•T25               |
| <b>Trp</b> | G73<br>A1:T72, G2:71<br>G3:C70<br>C34, C35, A36                     | C34, C35                  | <b>Lys</b>     | A73<br>T34, T35, T36                                                                                        |
| <b>Glu</b> | G1:C72, T2:A71<br>T34, T35<br>A37<br>TT:A24,<br>T13:G22•A46, Δ47    |                           | <b>Asn</b>     | G73<br>C34, T35, T36                                                                                        |
| <b>Gln</b> | G73<br>T1:A72, G2:C71<br>G3:C70<br>Y34, T35, G36<br>A37, T38<br>G10 |                           | <b>Phe</b>     | A73<br>G34, A35, A36<br>G27:C43, G28:C42<br>T20<br>G44, T45, T59, T60<br>A73<br>G34, A35, A36<br>A37<br>G20 |
| <b>Arg</b> | A/G73<br>C35, T/G36<br>A20                                          | C35, T/G36                | <b>Ala</b>     | A73<br>G2:C71, G3•T70<br>G4:C69<br>G20<br>G3•T70                                                            |
